# Supplementary material
Source: publisher figshare collection journal article supplement (https://karger.figshare.com/ndownloader/files/28985118)
Supplement: Supplementary file 1 [file 28985118]

**ELECTRONIC SUPPLEMENTARY FILE (ESF)**

Use of the Montreal Cognitive Assessment Thai version (MoCA) to discriminate amnestic mild cognitive impairment from Alzheimer’s disease and healthy controls: machine learning results.

Solaphat Hemrungrojn 1,2, Sookjaroen Tangwongchai 1, Thammanard Charoenboon 3, Muthita Panasawat 4, Thitiporn Supasitthumrong 1, Pisit Chaipresertsud 5, Pacharaporn Maleevach 6, Yuttachai Likitjaroen 7, Kammant Phanthumchinda 7, Michael Maes 1,8,9

1. Department of Psychiatry, Faculty of Medicine, Chulalongkorn University, Bangkok,

Thailand.

2. Cognitive fitness research group, Chulalongkorn University, Bangkok, Thailand.

3. Department of Clinical Epidemiology, Faculty of Medicine, Thammasat University, Prathumthani, Thailand.

4. Department of Psychiatry, Faculty of Medicine, Thammasat University, Prathumthani, Thailand.

5. Chao-Phraya-Abhaibhubejhr Hospital, Prachinburi, Thailand.

6. Angthong Hospital, Thailand.

7. Division of Neurology, Department of Medicine, Faculty of Medicine, Chulalongkorn University, Bangkok, Thailand.

8. Department of Psychiatry, Medical University of Plovdiv and Technological Center for Emergency Medicine, Plovdiv, Bulgaria.

9. IMPACT Strategic Research Centre, Deakin University, Geelong, Vic, Australia.

Corresponding author:

Prof. Dr. Michael Maes, M.D., Ph.D.

Department of Psychiatry

Faculty of Medicine

Chulalongkorn University

Patumwan Bangkok

Thailand 10330

[Dr.michaelmaes@hotmail.com](mailto:Dr.michaelmaes@hotmail.com)

<https://scholar.google.co.th/citations?user=1wzMZ7UAAAAJ&hl=th&oi=sra>

Solaphat Hemrungrojn : [solaphat@hotmail.com](mailto:solaphat@hotmail.com)

Michael Maes: [dr.michaelmaes@hotmail.com](mailto:dr.michaelmaes@hotmail.com)

**ESF Table 1.** The raw Montreal Cognitive Assessment (MOCA) subdomain scores in normal controls (HC), amnestic mild cognitive impairment (aMCI) and Alzheimer’s disease (AD).

| **Variables** | **Healthy Controls** | **aMCI** | **AD** |
| --- | --- | --- | --- |
| **VSS** | 3.43 (0.83) | 2.80 (1.09) | 1.15 (1.00) |
| 1-4 | 0-4 | 0-4 |
| **Language** | 4.92 (1.32) | 4.13 (1.17) | 2.32 (1.23) |
| 1-10 | 0-6 | 0-6 |
| **ACWM** | 5.53 (0.85) | 4.87 (1.21) | 3.23 (1.86) |
| 2-6 | 2-6 | 0-6 |
| **Executive Function** | 2.06 (1.05) | 1.49 (1.02) | 0.39 (0.78) |
| 0-3 | 0-3 | 0-3 |
| **Orientation** | 5.91 (0.33) | 5.57 (0.71) | 3.03 (1.61) |
| 4-6 | 3-6 | 0-6 |
| **Recall** | 2.98 (1.72) | 1.48 (1.42) | 0.25 (0.56) |
| 0-5 | 0-5 | 0-2 |
| **Sum MOCA** | 25.15 (3.0) | 20.90 (3.9) | 11.11 (4.6) |
| 17-30 | 13-28 | 2-21 |

Shown are raw mean values (SD) and range (minimum-maximum).

VSS: visual spatial skills, ACWM: attention, concentration and working memory.
